# Supplementary material
Source: Springer Nature journal article supplement (https://www.springermedizin.de/resource/supplementary/13023_2013_669_MOESM1_ESM.pdf/9642646)
Supplement: MOESM1 [file 9642646]

**Submission to a drug plan**

**Is it cost effective?**

**Is the price justified by the cost?**

**Yes**

**No**

**Yes**

**No**

**Insure the drug**

**Insure with cost-based price**

**Do not insure the drug**
